# Supplementary material for: Symptoms and risk factors for hospitalization of COVID-19 presented in primary care
Source: Springer Nature journal article supplement (doi:10.1007/s00508-021-01992-y), 2022-02-11
Supplement: MOESM1 [file 20127300]

# PrimeRisk C-19 Fälle in häuslicher Betreuung S1

|                                       |                      |                         |                              |                           |                           |                       |                      |                      |                      |
|---------------------------------------|----------------------|-------------------------|------------------------------|---------------------------|---------------------------|-----------------------|----------------------|----------------------|----------------------|
| ID Nr.Praxis                          | ID Nr. Patient       | Sex m=0,w=1             | Alter                        | Symptombeginn am          | PCR Test am               | PCR positiv           |                      |                      |                      |
| <input type="text"/>                  | <input type="text"/> | <input type="text"/>    | <input type="text"/>         | <input type="text"/>      | <input type="text"/>      | <input type="text"/>  |                      |                      |                      |
| negativ PCR Test bei Verdacht Covid19 |                      | Nur klin.Symptome       |                              | Angehoeiger pos getestet  |                           | Sonstiger Kontakt pos |                      |                      |                      |
| <input type="text"/>                  |                      | <input type="text"/>    |                              | <input type="text"/>      |                           | <input type="text"/>  |                      |                      |                      |
| <b>Risikofaktoren</b>                 |                      | BMI                     | Rauchen                      | Influenzaimpfung          |                           | Pneumokokkenimpfung   |                      |                      |                      |
| <input type="text"/>                  |                      | <input type="text"/>    | <input type="text"/>         | <input type="text"/>      |                           | <input type="text"/>  |                      |                      |                      |
| <b>Komorbiditäten</b>                 |                      | Asthma bronchiale       | COPD                         | Diabetes                  | KHK                       | Kard.Insuff.          | Hypertonie           | Kardiovaskul.KH      | Sonstige             |
| <input type="text"/>                  |                      | <input type="text"/>    | <input type="text"/>         | <input type="text"/>      | <input type="text"/>      | <input type="text"/>  | <input type="text"/> | <input type="text"/> | <input type="text"/> |
| Renale Insuffiz.                      | Lebererkrankung      | Aktive Tumorerkrank     | TBVT/Pulmonalembol           | Zerebrovask. Erkrank      | Demenz                    | Psych. Erkrank        |                      |                      |                      |
| <input type="text"/>                  | <input type="text"/> | <input type="text"/>    | <input type="text"/>         | <input type="text"/>      | <input type="text"/>      | <input type="text"/>  |                      |                      |                      |
| <b>Dauer-Medikamente</b>              |                      | Antihypertensiva        | ACE-Hemmer,ARB               | COPD-Medikation           | Immunsuppressiva-Kortison | Metformin             |                      |                      |                      |
| <input type="text"/>                  |                      | <input type="text"/>    | <input type="text"/>         | <input type="text"/>      | <input type="text"/>      | <input type="text"/>  |                      |                      |                      |
| Antidiabetika-orale Kombination       | Insulin              | Psychoaktive Medikation | Orale Antikoagulation        | Niedermolekulares Heparin |                           |                       |                      |                      |                      |
| <input type="text"/>                  | <input type="text"/> | <input type="text"/>    | <input type="text"/>         | <input type="text"/>      |                           |                       |                      |                      |                      |
| <b>Symptome Tag 1:</b>                |                      | T C°                    | HF durchschn.                | Dyspnoe ausgeprägt        | KH Gefühl stark           | Schwaeche ausgepraegt | Kopfschmerz          |                      |                      |
| <input type="text"/>                  |                      | <input type="text"/>    | <input type="text"/>         | <input type="text"/>      | <input type="text"/>      | <input type="text"/>  | <input type="text"/> |                      |                      |
| Gliederschmerzen                      | Rhinitis             | Husten                  | Thoraxdruck/schmerz          | Thorakale Beklemmung      | Anosmie,Agustie           |                       |                      |                      |                      |
| <input type="text"/>                  | <input type="text"/> | <input type="text"/>    | <input type="text"/>         | <input type="text"/>      | <input type="text"/>      |                       |                      |                      |                      |
| Gastrointest.Sympt.                   | RR                   | Halsschmerzen           | Anderer Tag Symptomerfassung |                           |                           |                       |                      |                      |                      |
| <input type="text"/>                  | <input type="text"/> | <input type="text"/>    | <input type="text"/>         |                           |                           |                       |                      |                      |                      |
| <b>Symptome Tag 5:</b>                |                      | T C°                    | HF durchschn.                | Dyspnoe ausgeprägt        | KH Gefühl stark           | Schwaeche ausgepraegt | Kopfschmerz          |                      |                      |
| <input type="text"/>                  |                      | <input type="text"/>    | <input type="text"/>         | <input type="text"/>      | <input type="text"/>      | <input type="text"/>  | <input type="text"/> |                      |                      |
| Gliederschmerzen                      | Rhinitis             | Husten                  | Thoraxdruck/schmerz          | Thorakale Beklemmung      | Anosmie,Agustie           |                       |                      |                      |                      |
| <input type="text"/>                  | <input type="text"/> | <input type="text"/>    | <input type="text"/>         | <input type="text"/>      | <input type="text"/>      |                       |                      |                      |                      |
| Gastrointest.Sympt.                   | RR                   | Halsschmerzen           | Anderer Tag Symptomerfassung |                           |                           |                       |                      |                      |                      |
| <input type="text"/>                  | <input type="text"/> | <input type="text"/>    | <input type="text"/>         |                           |                           |                       |                      |                      |                      |
| <b>Symptome Tag 7:</b>                |                      | T C°                    | HF durchschn.                | Dyspnoe ausgeprägt        | KH Gefühl stark           | Schwaeche ausgepraegt | Kopfschmerz          |                      |                      |
| <input type="text"/>                  |                      | <input type="text"/>    | <input type="text"/>         | <input type="text"/>      | <input type="text"/>      | <input type="text"/>  | <input type="text"/> |                      |                      |
| Gliederschmerzen                      | Rhinitis             | Husten                  | Thoraxdruck/schmerz          | Thorakale Beklemmung      | Anosmie,Agustie           |                       |                      |                      |                      |
| <input type="text"/>                  | <input type="text"/> | <input type="text"/>    | <input type="text"/>         | <input type="text"/>      | <input type="text"/>      |                       |                      |                      |                      |
| Gastrointest.Sympt.                   | RR                   | Halsschmerzen           | Anderer Tag Symptomerfassung |                           |                           |                       |                      |                      |                      |
| <input type="text"/>                  | <input type="text"/> | <input type="text"/>    | <input type="text"/>         |                           |                           |                       |                      |                      |                      |
| <b>Symptome Tag 8:</b>                |                      | T C°                    | HF durchschn.                | Dyspnoe ausgeprägt        | KH Gefühl stark           | Schwaeche ausgepraegt | Kopfschmerz          |                      |                      |
| <input type="text"/>                  |                      | <input type="text"/>    | <input type="text"/>         | <input type="text"/>      | <input type="text"/>      | <input type="text"/>  | <input type="text"/> |                      |                      |
| Gliederschmerzen                      | Rhinitis             | Husten                  | Thoraxdruck/schmerz          | Thorakale Beklemmung      | Anosmie,Agustie           |                       |                      |                      |                      |
| <input type="text"/>                  | <input type="text"/> | <input type="text"/>    | <input type="text"/>         | <input type="text"/>      | <input type="text"/>      |                       |                      |                      |                      |
| Gastrointest.Sympt.                   | RR                   | Halsschmerzen           | Anderer Tag Symptomerfassung |                           |                           |                       |                      |                      |                      |
| <input type="text"/>                  | <input type="text"/> | <input type="text"/>    | <input type="text"/>         |                           |                           |                       |                      |                      |                      |

ID Nr.Praxis  ID Nr. Patient

# PrimeRisk C-19 Fälle in häuslicher Betreuung S2

## Symptome Tag 10:

|                      |                      |                      |                      |                              |                      |
|----------------------|----------------------|----------------------|----------------------|------------------------------|----------------------|
| T C°                 | HF durchschn.        | Dyspnoe ausgeprägt   | KH Gefühl stark      | Schwache ausgepraegt         | Kopfschmerz          |
| <input type="text"/> | <input type="text"/> | <input type="text"/> | <input type="text"/> | <input type="text"/>         | <input type="text"/> |
| Gliederschmerzen     | Rhinitis             | Husten               | Thoraxdruck/schmerz  | Thorakale Beklemmung         | Anosmie,Agustie      |
| <input type="text"/> | <input type="text"/> | <input type="text"/> | <input type="text"/> | <input type="text"/>         | <input type="text"/> |
| Gastrointest.Sympt.  | RR                   |                      | Halsschmerzen        | Anderer Tag Symptomerfassung |                      |
| <input type="text"/> | <input type="text"/> |                      | <input type="text"/> | <input type="text"/>         |                      |

## Symptome Tag 14+:

|                      |                      |                      |                      |                              |                      |
|----------------------|----------------------|----------------------|----------------------|------------------------------|----------------------|
| T C°                 | HF durchschn.        | Dyspnoe ausgeprägt   | KH Gefühl stark      | Schwache ausgepraegt         | Kopfschmerz          |
| <input type="text"/> | <input type="text"/> | <input type="text"/> | <input type="text"/> | <input type="text"/>         | <input type="text"/> |
| Gliederschmerzen     | Rhinitis             | Husten               | Thoraxdruck/schmerz  | Thorakale Beklemmung         | Anosmie,Agustie      |
| <input type="text"/> | <input type="text"/> | <input type="text"/> | <input type="text"/> | <input type="text"/>         | <input type="text"/> |
| Gastrointest.Sympt.  | RR                   |                      | Halsschmerzen        | Anderer Tag Symptomerfassung |                      |
| <input type="text"/> | <input type="text"/> |                      | <input type="text"/> | <input type="text"/>         |                      |

Fiebertage>38° Woche1

Fiebertage>38° Woche2

Anzahl Covid19 Erkrankter Umfeld

## KH-Aufnahme noetig

wegen: Nierenversagen    Kreislaufversagen    Fieberhöhe/Dauer    Oedeme    Dyspnoe schwer

KH Aufnahme am

wegen sonstiger Ursache (Freitext)

Geplantes Ende Monitoring am

Abbruch häusliche Betreuung durch Arzt

Abbruch häusliche Betreuung durch Patient

## Komplikationen während der Erkrankung

Thrombose    Pulmonalembolie    MCI    Stroke

## Andere Komplikationen während der Erkrankung. Freitext

NMH s.c.während Erkrankung

## Längerfristige Komplikationen (innerhalb der ersten 3 Monate)

Thrombose    Pulmonalembolie    MCI    Stroke    Lungenfibrose

## Längerfristige andere Komplikationen (innerhalb der ersten 3 Monate) Freitext

Tod am

Todesursache

AK-Nachtestung geplant

Datum Nachtestung

Titerhoehe
