# Supplementary material for: Symptoms and risk factors for hospitalization of COVID-19 presented in primary care
Source: Springer Nature journal article supplement (doi:10.1007/s00508-021-01992-y), 2022-02-11
Supplement: MOESM2 [file 20127300]

Bogen zur Selbstbeobachtung Covid 19 Name: \_\_\_\_\_ Datum Testung: \_\_\_\_\_

1:

**Wenn Sie bei Atemnot einen Wert über 3 eintragen, oder sich plötzlich schlecht fühlen, rufen Sie bitte sofort Hausarzt/Hausärztin, oder 144 an.**

| Datum | Temp.<br>höchste<br>/ Tag | Krankheits-<br>gefühl | Atemnot | Schwäche | Schmerzen |         | Husten  | Brust-<br>enge | Weitere Symptome |         |
|-------|---------------------------|-----------------------|---------|----------|-----------|---------|---------|----------------|------------------|---------|
|       |                           |                       |         |          |           |         |         |                |                  |         |
|       |                           |                       |         |          | Glieder   | Ja/nein | Ja/nein | Ja/nein        | Geschmack        | Ja/nein |
|       |                           |                       |         |          | Kopf      | Ja/nein |         |                | Geruch           | Ja/nein |
|       |                           |                       |         |          | Hals      | Ja/nein |         |                | Durchfall        | Ja/nein |
|       |                           |                       |         |          | Ohren     | Ja/nein |         |                | Bauchweh         | Ja/nein |
|       |                           |                       |         |          | Glieder   | Ja/nein | Ja/nein | Ja/nein        | Geschmack        | Ja/nein |
|       |                           |                       |         |          | Kopf      | Ja/nein |         |                | Geruch           | Ja/nein |
|       |                           |                       |         |          | Hals      | Ja/nein |         |                | Durchfall        | Ja/nein |
|       |                           |                       |         |          | Ohren     | Ja/nein |         |                | Bauchweh         | Ja/nein |
|       |                           |                       |         |          | Glieder   | Ja/nein | Ja/nein | Ja/nein        | Geschmack        | Ja/nein |
|       |                           |                       |         |          | Kopf      | Ja/nein |         |                | Geruch           | Ja/nein |
|       |                           |                       |         |          | Hals      | Ja/nein |         |                | Durchfall        | Ja/nein |
|       |                           |                       |         |          | Ohren     | Ja/nein |         |                | Bauchweh         | Ja/nein |
|       |                           |                       |         |          | Glieder   | Ja/nein | Ja/nein | Ja/nein        | Geschmack        | Ja/nein |
|       |                           |                       |         |          | Kopf      | Ja/nein |         |                | Geruch           | Ja/nein |
|       |                           |                       |         |          | Hals      | Ja/nein |         |                | Durchfall        | Ja/nein |
|       |                           |                       |         |          | Ohren     | Ja/nein |         |                | Bauchweh         | Ja/nein |

Bogen zur Selbstbeobachtung Covid 19 Name: \_\_\_\_\_ Datum Testung: \_\_\_\_\_

2:

**Wenn Sie bei Atemnot einen Wert über 3 eintragen, oder sich plötzlich schlecht fühlen, rufen Sie bitte sofort Hausarzt/Hausärztin, oder 144 an.**

| Datum | Temp.<br>höchste<br>/ Tag | Krankheits-<br>gefühl | Atemnot | Schwäche | Schmerzen |         | Husten  | Brust-<br>enge | Weitere Symptome |         |
|-------|---------------------------|-----------------------|---------|----------|-----------|---------|---------|----------------|------------------|---------|
|       |                           |                       |         |          |           |         |         |                |                  |         |
|       |                           |                       |         |          | Glieder   | Ja/nein | Ja/nein | Ja/nein        | Geschmack        | Ja/nein |
|       |                           |                       |         |          | Kopf      | Ja/nein |         |                | Geruch           | Ja/nein |
|       |                           |                       |         |          | Hals      | Ja/nein |         |                | Durchfall        | Ja/nein |
|       |                           |                       |         |          | Ohren     | Ja/nein |         |                | Bauchweh         | Ja/nein |
|       |                           |                       |         |          | Glieder   | Ja/nein | Ja/nein | Ja/nein        | Geschmack        | Ja/nein |
|       |                           |                       |         |          | Kopf      | Ja/nein |         |                | Geruch           | Ja/nein |
|       |                           |                       |         |          | Hals      | Ja/nein |         |                | Durchfall        | Ja/nein |
|       |                           |                       |         |          | Ohren     | Ja/nein |         |                | Bauchweh         | Ja/nein |
|       |                           |                       |         |          | Glieder   | Ja/nein | Ja/nein | Ja/nein        | Geschmack        | Ja/nein |
|       |                           |                       |         |          | Kopf      | Ja/nein |         |                | Geruch           | Ja/nein |
|       |                           |                       |         |          | Hals      | Ja/nein |         |                | Durchfall        | Ja/nein |
|       |                           |                       |         |          | Ohren     | Ja/nein |         |                | Bauchweh         | Ja/nein |
|       |                           |                       |         |          | Glieder   | Ja/nein | Ja/nein | Ja/nein        | Geschmack        | Ja/nein |
|       |                           |                       |         |          | Kopf      | Ja/nein |         |                | Geruch           | Ja/nein |
|       |                           |                       |         |          | Hals      | Ja/nein |         |                | Durchfall        | Ja/nein |
|       |                           |                       |         |          | Ohren     | Ja/nein |         |                | Bauchweh         | Ja/nein |
